# Supplementary material for: Prenatal Polycyclic Aromatic Hydrocarbon (PAH) Exposure and Child Behavior at Age 6–7 Years
Source: PubMed Central journal article supplement (PMC3385432; doi:10.1289/ehp.1104315), 2012-03-14
Supplement: ehp.1104315.s001.pdf [file ehp.1104315.s001.pdf]

## Supplemental material

Prenatal Polycyclic Aromatic Hydrocarbon (PAH) Exposure and Child Behavior at age 6-7

Frederica P. Perera, Deliang Tang, Shuang Wang, Julia Vishnevetsky, Bingzhi Zhang, Diurka Diaz, David Camann, Virginia Rauh

## Contents

|                                                                                                                                                       |   |
|-------------------------------------------------------------------------------------------------------------------------------------------------------|---|
| Supplemental Material, Table 1. Estimated effects of all variables in the main model with PAH as the main predictor.....                              | 3 |
| Supplemental Material, Table 2. Estimated effects of all variables in the main model with maternal PAH (B[a]P)-DNA adducts as the main predictor..... | 4 |
| Supplemental Material, Table 3. Estimated effects of all variables in the main model with cord PAH (B[a]P)-DNA adducts as the main predictor .....    | 5 |
| Supplemental Table 4. Analysis adjusting for age 3 urinary PAH metabolites.....                                                                       | 6 |

Supplemental Material, Table 1. Estimated effects of all variables in the main model with PAH as the main predictor

| Variable                   | Anxious /Depressed      |         |                           |         | Attention Problems      |         |                           |         | DSM oriented Anxiety Problem |         | DSM oriented ADHD Problem |         |
|----------------------------|-------------------------|---------|---------------------------|---------|-------------------------|---------|---------------------------|---------|------------------------------|---------|---------------------------|---------|
|                            | Poisson Raw             |         | Logistic Dichotomized T   |         | Poisson Raw             |         | Logistic Dichotomized T   |         | Logistic Model               |         | Logistic Model            |         |
|                            | $\beta$<br>(95% CI)     | p-value | $\beta$<br>(95% CI)       | p-value | $\beta$<br>(95% CI)     | p-value | $\beta$<br>(95% CI)       | p-value | $\beta$<br>(95% CI)          | p-value | $\beta$<br>(95% CI)       | p-value |
| Intercept                  | -2.69<br>(-8.30, 2.92)  | 0.347   | -11.68<br>(-52.95, 29.60) | 0.579   | -1.20<br>(-5.89, 3.49)  | 0.616   | -15.40<br>(-50.99, 20.19) | 0.396   | -15.57<br>(-48.83, 17.69)    | 0.359   | 4.96<br>(-29.95, 39.88)   | 0.781   |
| PAH<br>(high/low)          | 0.37<br>(0.20, 0.54)    | <.0001  | 2.19<br>(0.53, 3.84)      | 0.01    | 0.24<br>(0.10, 0.39)    | 0.001   | 1.33<br>(0.13, 2.54)      | 0.030   | 1.52<br>(0.38, 2.66)         | 0.009   | 0.83<br>(-0.24, 1.90)     | 0.129   |
| Prenatal ETS               | -0.01<br>(-0.18, 0.16)  | 0.929   | 0.63<br>(-0.58, 1.83)     | 0.308   | 0.04<br>(-0.10, 0.19)   | 0.574   | -0.33<br>(-1.49, 0.83)    | 0.574   | 0.05<br>(-0.95, 1.06)        | 0.917   | 0.77<br>(-0.23, 1.78)     | 0.132   |
| Gender                     | -0.01<br>(-0.17, 0.15)  | 0.885   | -0.44<br>(-1.56, 0.68)    | 0.446   | -0.40<br>(-0.54, -0.26) | <.0001  | -0.72<br>(-1.81, 0.37)    | 0.198   | -0.72<br>(-1.67, 0.23)       | 0.136   | -0.18<br>(-1.19, 0.84)    | 0.734   |
| Gestational<br>age         | -0.05<br>(-0.10, 0.00)  | 0.042   | -0.35<br>(-0.67, -0.03)   | 0.032   | -0.05<br>(-0.09, -0.01) | 0.017   | -0.07<br>(-0.38, 0.23)    | 0.648   | -0.26<br>(-0.53, 0.00)       | 0.049   | -0.14<br>(-0.42, 0.14)    | 0.317   |
| Maternal IQ                | -0.01<br>(-0.02, 0.00)  | 0.167   | -0.01<br>(-0.08, 0.05)    | 0.727   | 0.00<br>(-0.01, 0.01)   | 0.862   | -0.02<br>(-0.08, 0.05)    | 0.587   | 0.00<br>(-0.06, 0.05)        | 0.933   | 0.00<br>(-0.06, 0.06)     | 0.969   |
| HOME<br>Inventory          | -0.01<br>(-0.03, 0.00)  | 0.105   | -0.09<br>(-0.19, 0.02)    | 0.095   | 0.01<br>(0.00, 0.03)    | 0.097   | 0.06<br>(-0.05, 0.17)     | 0.279   | -0.07<br>(-0.16, 0.02)       | 0.126   | -0.02<br>(-0.11, 0.08)    | 0.715   |
| Maternal<br>education      | 0.00<br>(-0.04, 0.04)   | 0.965   | -0.03<br>(-0.32, 0.26)    | 0.845   | -0.05<br>(-0.09, -0.01) | 0.007   | 0.02<br>(-0.25, 0.28)     | 0.911   | -0.06<br>(-0.28, 0.17)       | 0.612   | -0.11<br>(-0.36, 0.15)    | 0.406   |
| Ethnicity                  | -0.28<br>(-0.46, -0.10) | 0.002   | -0.88<br>(-2.20, 0.43)    | 0.188   | 0.02<br>(-0.13, 0.18)   | 0.75    | 0.00<br>(-1.17, 1.16)     | 0.994   | -0.69<br>(-1.78, 0.41)       | 0.218   | -0.03<br>(-1.11, 1.05)    | 0.962   |
| Prenatal<br>demoralization | 0.17<br>(0.05, 0.30)    | 0.008   | 0.06<br>(-0.89, 1.01)     | 0.900   | 0.24<br>(0.12, 0.35)    | <.0001  | 1.17<br>(0.30, 2.04)      | 0.009   | 0.62<br>(-0.14, 1.38)        | 0.112   | 0.95<br>(0.17, 1.72)      | 0.016   |
| Age at<br>assessment       | 0.07<br>(0.01, 0.14)    | 0.029   | 0.31<br>(-0.19, 0.81)     | 0.229   | 0.05<br>(0.00, 0.11)    | 0.057   | 0.14<br>(-0.28, 0.57)     | 0.503   | 0.31<br>(-0.09, 0.72)        | 0.127   | -0.02<br>(-0.42, 0.39)    | 0.934   |
| Heating season             | -0.17<br>(-0.34, 0.01)  | 0.06    | -0.90<br>(-2.13, 0.32)    | 0.149   | -0.23<br>(-0.38, -0.09) | 0.002   | -1.21<br>(-2.39, -0.03)   | 0.044   | -0.71<br>(-1.75, 0.34)       | 0.185   | -0.91<br>(-1.97, 0.15)    | 0.094   |

Coding: Ethnicity was coded as 1=African American, 0=Dominican;

Supplemental Material, Table 2. Estimated effects of all variables in the main model with maternal PAH (B[a]P)-DNA adducts as the main predictor

| Variable                | Anxious /Depressed      |         |                           |         | Attention Problems      |         |                           |         | DSM oriented Anxiety Problem |         | DSM oriented ADHD Problem |         |
|-------------------------|-------------------------|---------|---------------------------|---------|-------------------------|---------|---------------------------|---------|------------------------------|---------|---------------------------|---------|
|                         | Poisson Raw             |         | Logistic Dichotomized T   |         | Poisson Raw             |         | Logistic Dichotomized T   |         | Logistic Model               |         | Logistic Model            |         |
|                         | $\beta$<br>(95% CI)     | p-value | $\beta$<br>(95% CI)       | p-value | $\beta$<br>(95% CI)     | p-value | $\beta$<br>(95% CI)       | p-value | $\beta$<br>(95% CI)          | p-value | $\beta$<br>(95% CI)       | p-value |
| Intercept               | -3.84<br>(-9.74, 2.05)  | 0.201   | -18.69<br>(-65.01, 27.63) | 0.429   | -0.05<br>(-4.83, 4.73)  | 0.984   | -17.16<br>(-53.53, 19.21) | 0.355   | -19.80<br>(-54.94, 15.34)    | 0.269   | 6.29<br>(-29.35, 41.93)   | 0.729   |
| Maternal adducts        | 0.21<br>(0.03, 0.38)    | 0.019   | 0.35<br>(-0.97, 1.68)     | 0.603   | 0.23<br>(0.08, 0.37)    | 0.003   | 0.81<br>(-0.30, 1.91)     | 0.153   | 0.78<br>(-0.24, 1.80)        | 0.133   | 0.61<br>(-0.41, 1.63)     | 0.243   |
| Prenatal ETS            | 0.01<br>(-0.17, 0.19)   | 0.914   | 1.19<br>(-0.21, 2.59)     | 0.097   | 0.04<br>(-0.12, 0.19)   | 0.643   | -0.04<br>(-1.24, 1.16)    | 0.947   | 0.27<br>(-0.81, 1.35)        | 0.622   | 1.07<br>(0.01, 2.14)      | 0.048   |
| Gender                  | 0.12<br>(-0.05, 0.30)   | 0.175   | 0.23<br>(-1.12, 1.58)     | 0.736   | -0.35<br>(-0.50, -0.21) | <.0001  | -0.57<br>(-1.70, 0.56)    | 0.319   | -0.28<br>(-1.32, 0.76)       | 0.598   | -0.09<br>(-1.16, 0.98)    | 0.873   |
| Gestational age         | -0.04<br>(-0.09, 0.02)  | 0.182   | -0.28<br>(-0.65, 0.09)    | 0.132   | -0.03<br>(-0.07, 0.02)  | 0.239   | -0.07<br>(-0.38, 0.25)    | 0.676   | -0.21<br>(-0.49, 0.08)       | 0.154   | -0.13<br>(-0.42, 0.16)    | 0.393   |
| Maternal IQ             | -0.01<br>(-0.02, 0.00)  | 0.225   | 0.01<br>(-0.08, 0.09)     | 0.903   | 0.00<br>(-0.01, 0.01)   | 0.523   | 0.00<br>(-0.07, 0.07)     | 0.987   | 0.01<br>(-0.06, 0.07)        | 0.809   | 0.02<br>(-0.05, 0.09)     | 0.533   |
| HOME Inventory          | -0.01<br>(-0.03, 0.01)  | 0.253   | -0.11<br>(-0.23, 0.01)    | 0.063   | 0.00<br>(-0.01, 0.02)   | 0.528   | 0.06<br>(-0.05, 0.17)     | 0.268   | -0.07<br>(-0.16, 0.02)       | 0.139   | -0.02<br>(-0.12, 0.07)    | 0.617   |
| Maternal education      | 0.02<br>(-0.02, 0.07)   | 0.271   | 0.16<br>(-0.21, 0.52)     | 0.397   | -0.04<br>(-0.08, 0.00)  | 0.039   | 0.05<br>(-0.24, 0.34)     | 0.730   | 0.02<br>(-0.22, 0.27)        | 0.857   | -0.08<br>(-0.35, 0.19)    | 0.551   |
| Ethnicity               | -0.33<br>(-0.53, -0.13) | 0.001   | -1.22<br>(-2.81, 0.36)    | 0.131   | 0.02<br>(-0.14, 0.19)   | 0.778   | -0.33<br>(-1.57, 0.90)    | 0.596   | -0.90<br>(-2.13, 0.32)       | 0.148   | -0.23<br>(-1.37, 0.92)    | 0.699   |
| Prenatal demoralization | 0.07<br>(-0.07, 0.21)   | 0.330   | -0.43<br>(-1.58, 0.73)    | 0.468   | 0.15<br>(0.03, 0.27)    | 0.013   | 0.65<br>(-0.22, 1.52)     | 0.145   | 0.34<br>(-0.47, 1.14)        | 0.415   | 0.57<br>(-0.23, 1.36)     | 0.161   |
| Age at assessment       | 0.08<br>(0.01, 0.15)    | 0.031   | 0.36<br>(-0.21, 0.92)     | 0.215   | 0.03<br>(-0.03, 0.09)   | 0.294   | 0.16<br>(-0.27, 0.59)     | 0.465   | 0.33<br>(-0.10, 0.76)        | 0.128   | -0.04<br>(-0.45, 0.37)    | 0.848   |
| Heating season          | -0.10<br>(-0.28, 0.08)  | 0.290   | -0.77<br>(-2.17, 0.64)    | 0.286   | -0.17<br>(-0.32, -0.02) | 0.031   | -0.57<br>(-1.76, 0.61)    | 0.345   | -0.36<br>(-1.47, 0.74)       | 0.521   | -0.45<br>(-1.53, 0.63)    | 0.416   |

Supplemental Material, Table 3. Estimated effects of all variables in the main model with cord PAH (B[a]P)-DNA adducts as the main predictor

| Variable                | Anxious /Depressed      |         |                          |         | Attention Problems      |         |                          |         | DSM oriented Anxiety Problem |         | DSM oriented ADHD Problem |         |
|-------------------------|-------------------------|---------|--------------------------|---------|-------------------------|---------|--------------------------|---------|------------------------------|---------|---------------------------|---------|
|                         | Poisson Raw             |         | Logistic Dichotomized T  |         | Poisson Raw             |         | Logistic Dichotomized T  |         | Logistic Model               |         | Logistic Model            |         |
|                         | $\beta$<br>(95% CI)     | p-value | $\beta$<br>(95% CI)      | p-value | $\beta$<br>(95% CI)     | p-value | $\beta$<br>(95% CI)      | p-value | $\beta$<br>(95% CI)          | p-value | $\beta$<br>(95% CI)       | p-value |
| Intercept               | -4.81<br>(-11.83, 2.21) | 0.179   | -6.93<br>(-54.60, 40.74) | 0.776   | -0.27<br>(-6.09, 5.54)  | 0.927   | -6.06<br>(-44.31, 32.18) | 0.756   | -5.97<br>(-45.94, 33.99)     | 0.770   | -4.19<br>(-41.94, 33.57)  | 0.828   |
| Cord adducts            | 0.38<br>(0.18, 0.58)    | 0.000   | 0.94<br>(-0.37, 2.24)    | 0.159   | 0.28<br>(0.10, 0.46)    | 0.002   | 1.40<br>(-0.01, 2.81)    | 0.051   | 0.93<br>(-0.18, 2.03)        | 0.101   | 0.97<br>(-0.39, 2.33)     | 0.161   |
| Prenatal ETS            | -0.03<br>(-0.24, 0.19)  | 0.820   | 0.55<br>(-0.77, 1.88)    | 0.413   | 0.14<br>(-0.04, 0.33)   | 0.138   | -0.25<br>(-1.72, 1.21)   | 0.735   | -0.13<br>(-1.34, 1.07)       | 0.827   | 0.56<br>(-0.78, 1.89)     | 0.414   |
| Gender                  | -0.19<br>(-0.39, 0.01)  | 0.063   | -0.74<br>(-2.03, 0.55)   | 0.260   | -0.42<br>(-0.59, -0.25) | <.0001  | -0.58<br>(-1.90, 0.73)   | 0.383   | -1.00<br>(-2.12, 0.12)       | 0.079   | -0.75<br>(-2.08, 0.59)    | 0.271   |
| Gestational age         | -0.04<br>(-0.10, 0.02)  | 0.224   | -0.36<br>(-0.73, 0.02)   | 0.062   | -0.05<br>(-0.10, 0.01)  | 0.076   | -0.05<br>(-0.46, 0.36)   | 0.804   | -0.33<br>(-0.65, -0.01)      | 0.043   | 0.05<br>(-0.39, 0.49)     | 0.828   |
| Maternal IQ             | -0.01<br>(-0.03, 0.00)  | 0.049   | -0.01<br>(-0.09, 0.07)   | 0.787   | 0.00<br>(-0.01, 0.01)   | 0.637   | 0.00<br>(-0.08, 0.09)    | 0.936   | 0.01<br>(-0.06, 0.07)        | 0.867   | 0.01<br>(-0.07, 0.09)     | 0.817   |
| HOME Inventory          | -0.02<br>(-0.04, 0.00)  | 0.060   | -0.05<br>(-0.16, 0.06)   | 0.378   | 0.01<br>(-0.01, 0.03)   | 0.268   | 0.08<br>(-0.06, 0.22)    | 0.247   | -0.07<br>(-0.16, 0.03)       | 0.193   | 0.06<br>(-0.07, 0.20)     | 0.357   |
| Maternal education      | 0.04<br>(-0.01, 0.09)   | 0.079   | 0.10<br>(-0.25, 0.45)    | 0.570   | -0.01<br>(-0.05, 0.04)  | 0.722   | 0.16<br>(-0.21, 0.53)    | 0.405   | 0.06<br>(-0.21, 0.32)        | 0.679   | 0.04<br>(-0.32, 0.40)     | 0.818   |
| Ethnicity               | -0.25<br>(-0.49, -0.01) | 0.040   | -0.73<br>(-2.26, 0.80)   | 0.351   | 0.04<br>(-0.16, 0.24)   | 0.666   | 0.03<br>(-1.46, 1.52)    | 0.971   | -0.74<br>(-2.06, 0.57)       | 0.269   | 0.23<br>(-1.24, 1.70)     | 0.759   |
| Prenatal demoralization | 0.19<br>(0.03, 0.35)    | 0.019   | -0.12<br>(-1.21, 0.98)   | 0.835   | 0.20<br>(0.06, 0.35)    | 0.007   | 0.38<br>(-0.72, 1.47)    | 0.498   | 0.50<br>(-0.40, 1.40)        | 0.278   | 1.06<br>(0.02, 2.10)      | 0.046   |
| Age at assessment       | 0.09<br>(0.01, 0.17)    | 0.027   | 0.23<br>(-0.33, 0.80)    | 0.419   | 0.04<br>(-0.03, 0.10)   | 0.261   | 0.00<br>(-0.43, 0.42)    | 0.985   | 0.22<br>(-0.25, 0.69)        | 0.358   | -0.06<br>(-0.47, 0.34)    | 0.765   |
| Heating season          | 0.03<br>(-0.18, 0.25)   | 0.770   | 0.28<br>(-1.15, 1.71)    | 0.697   | -0.22<br>(-0.40, -0.03) | 0.021   | -0.55<br>(-1.93, 0.83)   | 0.433   | 0.04<br>(-1.16, 1.24)        | 0.948   | -0.32<br>(-1.70, 1.06)    | 0.654   |

Supplemental Table 4. Analysis adjusting for age 3 urinary PAH metabolites.

| Variable                | Anxious Depressed |                |         | Attention |                |         |
|-------------------------|-------------------|----------------|---------|-----------|----------------|---------|
|                         | Beta              | 95% CI         | P-value | Beta      | 95% CI         | P-value |
| Intercept               | -0.25             | (-7.68, 7.19)  | 0.948   | -3.58     | (-9.91, 2.76)  | 0.268   |
| PAH (high/low)          | 0.54              | (0.34, 0.74)   | <.0001  | 0.32      | (0.15, 0.50)   | 0.000   |
| Prenatal ETS            | 0.03              | (-0.19, 0.24)  | 0.806   | -0.06     | (-0.24, 0.12)  | 0.501   |
| Gender                  | -0.01             | (-0.20, 0.18)  | 0.947   | -0.38     | (-0.55, -0.21) | <.0001  |
| Gestational age         | -0.09             | (-0.15, -0.04) | 0.001   | -0.04     | (-0.09, 0.01)  | 0.124   |
| Maternal IQ             | -0.01             | (-0.02, 0.00)  | 0.104   | -0.01     | (-0.02, 0.00)  | 0.238   |
| HOME Inventory          | -0.02             | (-0.03, 0.00)  | 0.058   | 0.00      | (-0.01, 0.02)  | 0.653   |
| Maternal education      | 0.03              | (-0.02, 0.09)  | 0.251   | -0.01     | (-0.06, 0.03)  | 0.581   |
| Ethnicity               | -0.27             | (-0.49, -0.04) | 0.019   | 0.08      | (-0.11, 0.28)  | 0.385   |
| Prenatal demoralization | 0.16              | (0.00, 0.31)   | 0.049   | 0.18      | (0.04, 0.32)   | 0.012   |
| Age at assessment       | 0.06              | (-0.03, 0.14)  | 0.205   | 0.07      | (-0.01, 0.14)  | 0.071   |
| Heating season          | -0.29             | (-0.50, -0.09) | 0.005   | -0.37     | (-0.55, -0.20) | <.0001  |
| PAH metabolites         | 0.05              | (-0.06, 0.15)  | 0.384   | 0.07      | (-0.01, 0.16)  | 0.099   |
